# Supplementary material for: Characteristics and outcomes of hospitalised patients with acute kidney injury and COVID-19
Source: PubMed Central journal article supplement (PMC7608889; doi:10.1371/journal.pone.0241544), 2020-11-03
Supplement: pone.0241544.s004.pdf [file pone.0241544.s004.pdf]

Current WYTHENSHWE In-Patients COVID-19 tested, discharged but require telephone f/up

Ward team complete EPR referral form, high risk patients\* given O2 sats probe to go home

OPAT team to receive referral and 'admit' to COVID19-Virtual ward under ID consultant of the week

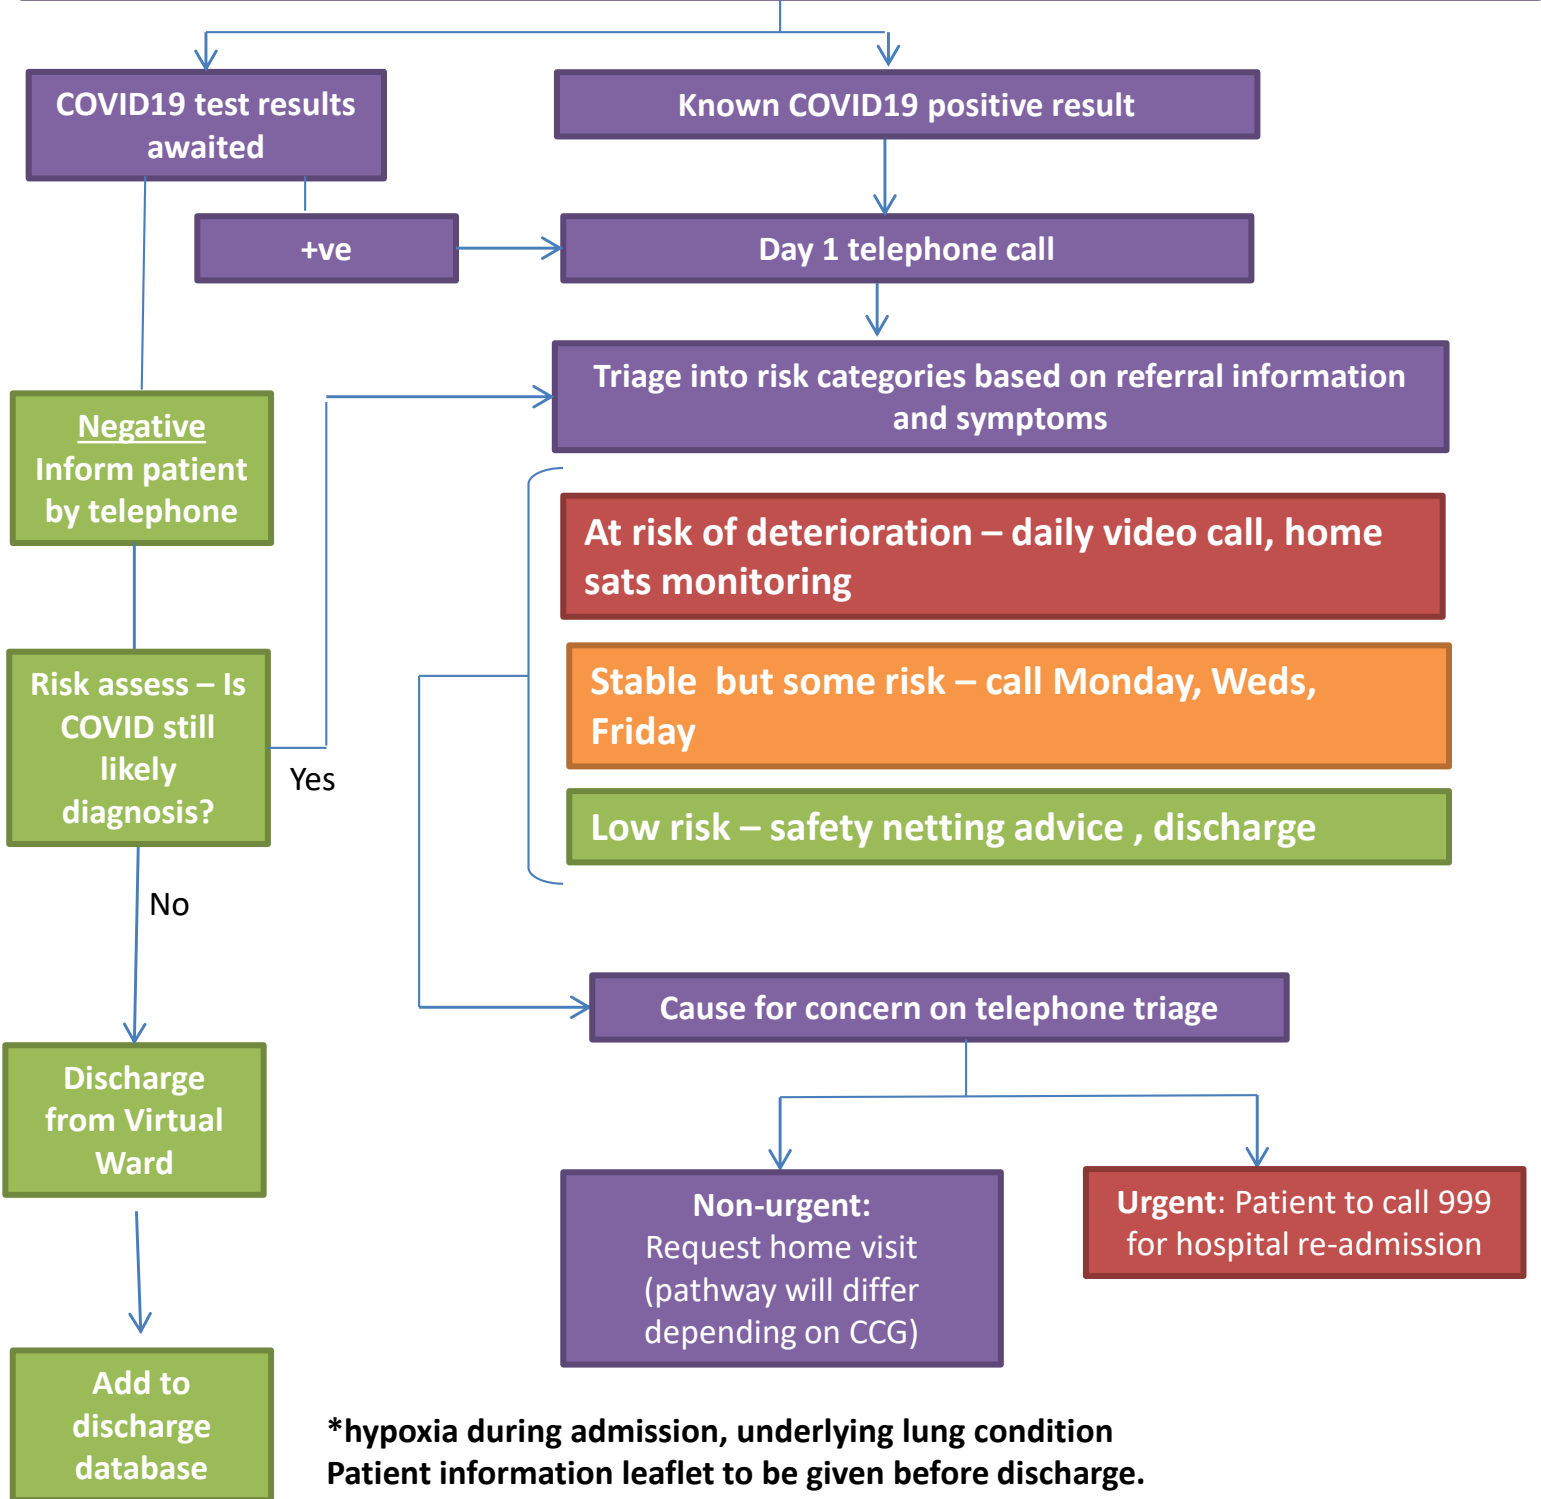

\*hypoxia during admission, underlying lung condition  
Patient information leaflet to be given before discharge.  
Discharge checklist completed, discharge summary states 'discharged to virtual ward'

Current OXFORD ROAD SITE inpatients with suspected or confirmed COVID-19

Ward team complete EPR Chameleon referral form

Provide thermometer if available

Is patient in high risk group?

Explain Virtual ward process and give leaflet Virtual1 if available

Yes

Provide pulse oximeter if available

No

Day 1 video/phone call

COVID negative\*

Discharge from virtual ward\*

Explain discharge information and SMS leaflet DischN

What is level of concern?

Low

Medium

High

Highest

What is the outcome?

Discharge from virtual ward

Explain discharged from Virtual Ward. Letter to GP

Phone/video call in 2 days

Phone/video call next day

Video call +/- home visit

Ask patient to dial 999

Explain discharged from Virtual Ward. Letter to GP

Repeat until patient can be discharged from Virtual Ward

RIP COVID/other causes

DNA still alive

Letter to GP, consider letter to patient

\* If COVID PCR negative but high clinical suspicion of COVID remains, keep in virtual pathway and assess accordingly

### Wythenshawe Hospital Team – 8am – 5pm (7 days)

| Name                                                              | Title                     | Role                                                                          | Backup in case of sickness                                     |
|-------------------------------------------------------------------|---------------------------|-------------------------------------------------------------------------------|----------------------------------------------------------------|
| Binita Kane<br>Riina Richardson<br>Giorgio Calisti<br>Rohit Bazaz | Consultant                | Oversight of service<br>Specialist advice                                     | Cross-cover for sickness<br>Ashley Woodcock<br>Caroline Baxter |
| Helen Bradbury                                                    | Administrator<br>(WTE B2) | Assisting in Virtual Ward<br>administration                                   | All OPAT members<br>trained in these roles                     |
| Carole Toner                                                      | HCS B3                    |                                                                               |                                                                |
| Liz Wilson                                                        | Band 8 lead               | Nursing lead for service<br><br>Oversight of VW<br>Processes and nursing team | Consultants/OPAT<br>nurses                                     |
| Vicky Whitehead<br>Lynn Connor<br>Ben Freeman<br>Raquel Gonzales  | Band 6 nurses             | Telephone follow-up of<br>patients                                            | Cross-cover between<br>team<br><br>Other NWLC staff            |

### Oxford Road Team – 8.30am – 4.30pm (7 days)

| Name                                     | Title                                                 | Role                                                                                                     | Backup in case of sickness       |
|------------------------------------------|-------------------------------------------------------|----------------------------------------------------------------------------------------------------------|----------------------------------|
| Tom Gorsuch<br>Waseem Khan<br>Seema Brij | Consultant                                            | Oversight of service<br>Specialist advice                                                                | Respiratory Consultants          |
| Sundilla Rafiq<br>Katie Birch            | Medical secretary /<br>assistant medical<br>secretary | Assisting in Virtual<br>Ward administration                                                              | Kathryn Birchenough              |
| Shane O'Reilly                           | Band 8 lead                                           | Clinical and managerial<br>lead for service<br><br>Oversight of VW<br>processes and<br>nurse/physio team | Consultant / senior<br>COPD team |
| COPD Team<br>Asthma Team                 | Band 6/7 nurses<br>and AHPs                           | Telephone follow-up of<br>patients<br>Home Visits as required                                            | Respiratory<br>Physiologists     |

# Process for managing virtual ward

## 1) Day 1 patients coded 'red'

- Triage into traffic light system by telephone assessment following proforma
- Call details recorded via a communications note on EPR
- Tracking board updated

RED – daily phone call /video call using proforma questions

AMBER – call Monday, Wednesday, Friday

GREEN – safety netting advice, consider 1 further call or discharge.

## 2) Board round midday to discuss patients and any concerns.

## 3) Patients triggering 'cause for concern'

- Establish which CCG their GP practice falls into
- If urgent ask patient to call 999, patient to inform NWAS of COVID status
- For non-urgent patients, request same day visit following guidance from individual CCG

## 4) Discharging patients

- Remove from tracking board and transfer to discharge list
- Generate GP letter via Winscribe / Medisec acc to template
- Advice: no need to self isolate if >14 days from onset of symptoms
- General safety netting advice, if need for ongoing clinical review – follow usual pathways (e.g. GP, community teams if know to them)
- No need to follow PHE guidance for high-risk patients as should have immunity

# Telephone follow-up questions

## Wythenshawe

Daily phone calls:

**Q: How is your breathing today?**

**Q: Is it better, worse, no change from yesterday?**

**Q: Are you breathing harder or faster than usual when doing nothing at all?**

**Q: What could you do yesterday that you can't do today?**

**Q: What makes you breathless now that didn't make you breathless yesterday?**

- **Dyspnoea or Tachypnoea +/- hypoxia = ALERT**

**Q: Are there any other symptoms causing you concern?**

**If so, document the concern and discuss on the daily boardround if symptom does not trigger immediate medical review or 999 transfer to hospital**

Discuss self-isolation/social distancing.

Discuss isolation of household members.

Agree next steps i.e. when to expect the next phone call

Ensure the pt knows how & when to escalate (see PIL)

Any other questions?

**Document via communication note on EPR**

## Oxford Road Site

### Day 1 phone call

- Introduction
- Confirm ID
- Ask how they are feeling
- Provide COVID result if available (if negative, see below)
- Ask set questions
- Explain and SMS plan
- Remind isolation rules
- Offer to SMS Virtual 1 if not received
- Contact phone numbers GP/111/999

### Daily questions

- How is your breathing today?
  - Is it better, the same or worse than yesterday?
  - Are you more breathless than usual when you are not doing anything?
- (If worse) Is there anything you could do yesterday which you can't today?
- What are the readings on your oxygen probe?
  - Heart rate (HR), oxygen saturation (SpO2), temp
- Are you coughing? Is this better/the same/worse than yesterday?
- Are you bringing up phlegm or blood? Is this better/the same/worse than yesterday?
- Are there any other symptoms you are concerned about?

### Subsequent phone calls

- Introduction
- Confirm ID
- Ask how they are feeling
- Provide COVID result when available (if negative, see below)
- Ask set questions
- Explain and SMS plan
- Remind isolation rules
- Offer to SMS Virtual 1 if not received
- Contact phone numbers GP/111/999

# Home visit - Manchester

## Central Manchester

Contact Central Community Respiratory Team

Telephone: 0161 276 6035

## South Manchester

Discuss with Dr Kane or Community Respiratory Team (CRT) whether patient is appropriate for CRT review

CRT: 01612915965 or page via switchboard

If not appropriate, discuss with COVID GP home review service (**details awaited**)

## CCG/Community leads for escalation of issues

Murugesan Raja (CCG lead)

[murugesan.raja@nhs.net](mailto:murugesan.raja@nhs.net)

Mobile: 07963876942

Doug Jeffrey (CD for Community services)

[doug.jeffrey@nhs.net](mailto:doug.jeffrey@nhs.net)

Mobile: 07590 670755

## Home visits - Trafford

Telephone: **0161 975 4741** to give details of patient  
Operational Hours: 0800 – 1600hrs

Email: [tspoa1@nhs.net](mailto:tspoa1@nhs.net)  
In subject: type 'FAO Trafford Matrons' to confirm details in writing

### **Trafford CCG/Community contacts for escalation of issues**

Brooks Kenny (Commissioner)  
[brookskenny@nhs.net](mailto:brookskenny@nhs.net)  
07971483828

Richard Spearing (Trafford LCO)  
[richard.spearing@nhs.net](mailto:richard.spearing@nhs.net)  
07920581980

Lesley Lyons (Lead for Trafford Matrons)  
[llyons@nhs.net](mailto:llyons@nhs.net)  
07415242389

Trafford Matrons acute case load is full – **a/w details of COVID hot hubs and home visiting service**

## Home visits - Stockport

The Crisis Response Team can be contacted on: **0161 476 9665**  
Operational hours: 8am – 10pm, 7 days a week  
Multi-disciplinary team

### **CCG/Community Contacts for escalation of issues**

[nicole.alkemade@nhs.net](mailto:nicole.alkemade@nhs.net) Commissioning lead  
Mobile: 07795267081

### **Jayne Etches**

Professional Service Lead | Crisis Response Team | 1st Floor | Kingsgate House | Wellington Road South | Stockport | SK4 1LW  
07810-816214  
[Jayne.etches@nhs.net](mailto:Jayne.etches@nhs.net)

### **Lisa Lainton**

Head of Borough Wide Services  
Integrated Care Business Group  
Currently based in Estates Dept.  
Stockport  
SK2 4JT  
temp No. 07760666370  
Days worked. Mon, Tues, Thurs, Friday.  
Please note new email [lisajane.lainton@nhs.net](mailto:lisajane.lainton@nhs.net)

# PHE guidance on PPE and isolation

- For the confirmed COVID cases that are discharged from hospital, self-isolation can be lifted 7 days after symptom onset according to PHE guidelines updated on 18/03/20  
link:<https://www.gov.uk/government/publications/covid-19-stay-at-home-guidance/stay-at-home-guidance-for-households-with-possible-coronavirus-covid-19-infection>
- Household contacts need to remain in self-isolation for longer - 14 days from onset of symptoms in the household index case.
- **After 7 days from symptoms onset, staff visiting the confirmed case at home do not need to wear PPE**
- If there are other people in the same household that are symptomatic and have been unwell for less than 7 days, the visiting staff should avoid any contact with them.



# Team contact details

**South Manchester Virtual Ward team:**

Call OPAT on 0161 291 4207 (staff only)

Patients will be provided with a separate number manned by NWLC nurses.

**For Senior Medical Advice**

Call Wythenshawe switchboard: 01619987070 and ask for the Infectious Diseases (ID) Consultant on-call

\*\* further details of Resp consultant advice and guidance to be provided\*\*

**For logistic issues regarding the virtual ward or community pathways**

Wythenshawe: call switchboard 01619987070 and ask for Dr Kane on her mobile phone

**Central Manchester Virtual Ward team:**

Call 0161 276 4379 or 0161 276 6035

**For Senior Medical Advice**

Speak to COVID admissions unit Consultant

**For logistic issues regarding the virtual ward or community pathways**

MRI: call switchboard 0161 276 6035 ask to speak to Shane O'Reilly or senior member of COPD team if not available

# Workforce requirements (per site)

| Virtual ward numbers | Average daily phone calls | Average weekly phone calls 7/7 | Total time required (hours) | Spec Nurse (WTE) | Consultant daily hours | Consultant weekly hours (7/7) | Consultant PAs |
|----------------------|---------------------------|--------------------------------|-----------------------------|------------------|------------------------|-------------------------------|----------------|
| 20                   | 10                        | 70                             | 23.3                        | 0.6              | 0.5                    | 3.5                           | 0.9            |
| 40                   | 20                        | 140                            | 46.7                        | 1.2              | 1.0                    | 7                             | 1.8            |
| 60                   | 30                        | 210                            | 70.0                        | 1.8              | 1.5                    | 10.5                          | 2.6            |
| 80                   | 40                        | 280                            | 93.3                        | 2.3              | 3.0                    | 21                            | 5.3            |
| 100                  | 50                        | 350                            | 116.7                       | 2.9              | 2.5                    | 17.5                          | 4.4            |
| 120                  | 60                        | 420                            | 140.0                       | 3.5              | 5.0                    | 35                            | 8.8            |
| 140                  | 70                        | 490                            | 163.3                       | 4.1              | 3.5                    | 24.5                          | 6.1            |

\*based on each phone call plus administration requiring 20 minutes

Each time numbers increase by 20, a staffing review will be triggered. Staff will be added to the virtual ward team from a bank of clinical staff who have been redeployed from the front line.

This modelling relates only to phone calls and does not take into account the number of visits that may be required. This is as yet an unknown quantity but will be kept under review as the model progresses. As a general rule one member of qualified staff will be able to undertake a maximum of 6 home visits in a day.

# Performance Measures

- Number of daily referrals
- Number of readmissions within 7 days and 14 days.

## **Audit and publication**

Additional data will be collected by clinical teams for anonymized rapid publication of service evaluation.

# Management of COVID results at Wythenshawe\* – role of virtual ward

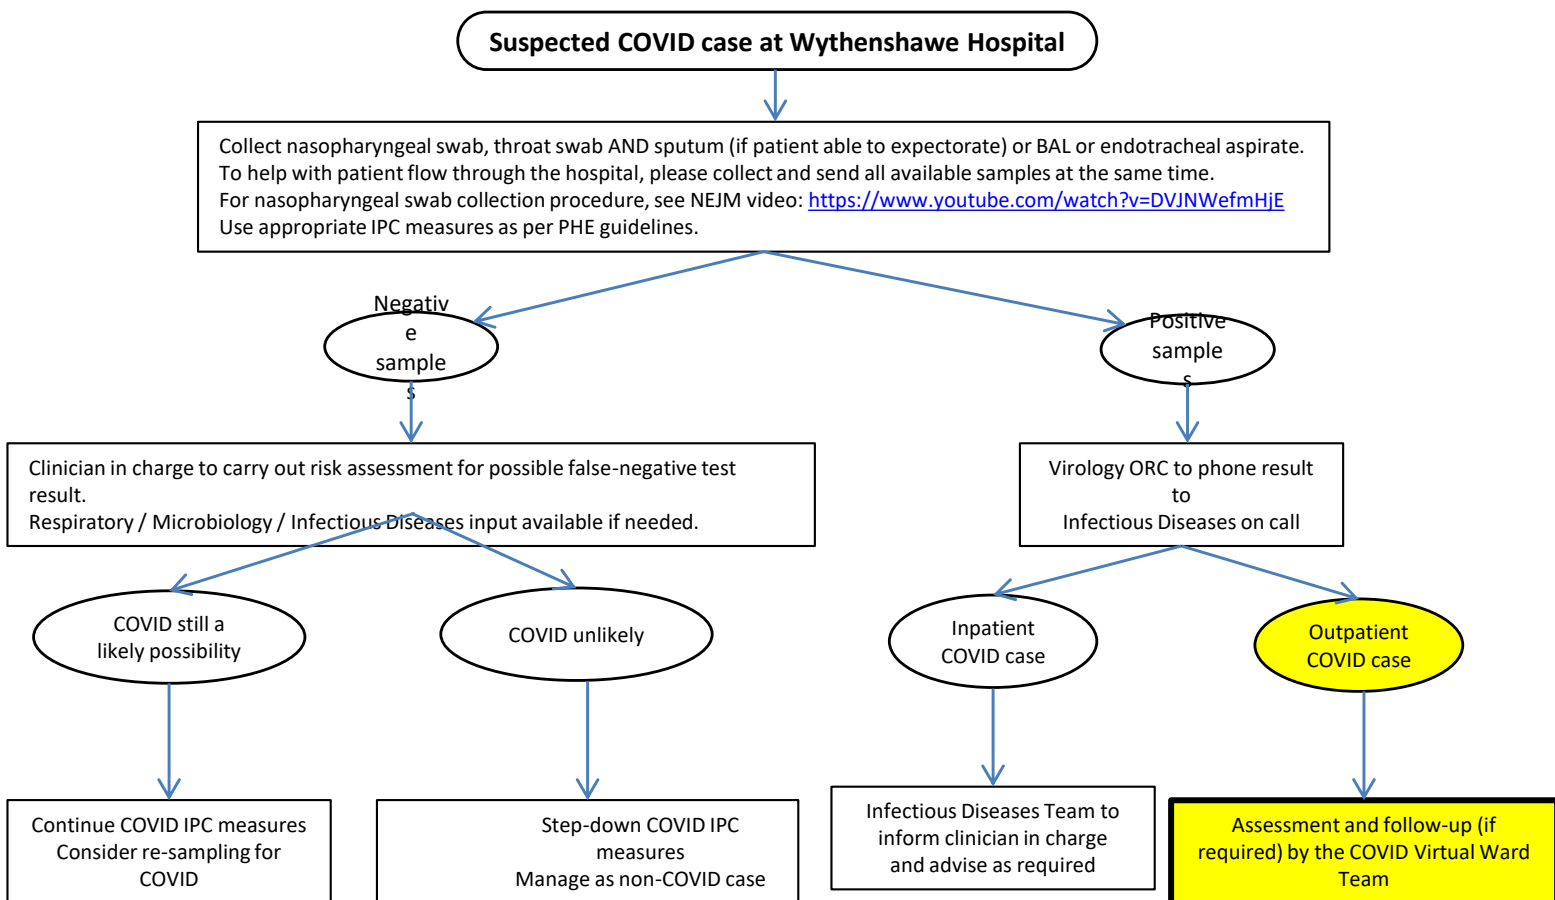

\*ORC pathway TBC
